# Supplementary material for: Increased B3GALNT2 in hepatocellular carcinoma promotes macrophage recruitment via reducing acetoacetate secretion and elevating MIF activity
Source: J Hematol Oncol. 2018 Apr 4;11:50. doi: 10.1186/s13045-018-0595-3 (PMC5885466; doi:10.1186/s13045-018-0595-3)
Supplement: Supplementary file 7 — Table S3. B3GALNT2-associated metabolites determined by LC-MS and the functional enrichment of KEGG pathway on these metabolites. (XLSX 39 kb) [file 13045_2018_595_MOESM7_ESM.xlsx]

## Sheet: Metabolites details
Table S3.1:B3GALNT2-associated Metabolites determined by LC-MS
m/z	RT(min)	Ion mode	Metabolites	Adducts	ppm/da	P-value	FC(B/C)	FC(C/B)	Average(B)	Average(C)	B1	B2	B3	B4	B5	B6	B7	B8	C1	C2	C3	C4	C5	C6	C7	C8
83.0134	0.67	NEG	Acetoacetic acid	M-H2O-H	0	3.0003e-12	0.0441778	22.6358	0.290746	6.58127	0.317276	0.303688	0.294098	0.227835	0.297512	0.290746	0.277122	0.317693	5.21779	5.54061	7.58701	6.96689	6.85675	6.58127	7.21029	6.68957
348.31	4.28	POS	Prostaglandin F1a-d9	M+H-H2O	0	1.62352e-11	0.083131	12.0292	4.24991	51.123	4.41429	4.31089	4.23792	3.73369	4.2639	4.51236	4.10874	4.41747	39.7044	42.1609	57.7328	53.014	52.176	58.426	54.8662	50.9038
683.464	13.95	POS	PA(13:0/22:4(7Z,10Z,13Z,16Z))	M+H	1	1.47743e-10	0.0907827	11.0153	0.145135	1.59871	0.0812157	0.0793564	0.120359	0.162325	0.199244	0.163438	0.182739	0.172406	1.40165	1.4526	1.45086	1.74404	1.64146	1.95783	1.87584	1.26541
349.30974	4.29	POS	5-Heptadecyl-1,3-benzenediol	M+H	1	8.54984e-12	0.117153	8.53584	1.16111	9.91107	1.22798	1.09954	1.0328	0.925869	1.13902	1.10398	1.44352	1.31618	7.93027	8.37564	11.1637	10.0836	9.77713	11.2633	10.5312	10.1638
659.463	13.94	NEG	PG(O-16:0/14:1(9Z))	M-H2O-H	2	8.81935e-10	0.133383	7.49721	2.95023	22.1185	1.17439	2.23358	2.22896	2.2777	3.35973	3.36263	5.59719	3.36767	16.2312	19.8405	22.8753	25.8605	24.9328	21.7907	26.1787	19.2384
838.423	3.08	NEG	Monoammonium glycyrrhizinate	M-H	0	3.99522e-08	0.283639	3.52561	1.51983	5.35834	1.11491	1.19658	1.29784	0.924699	1.30223	2.34342	1.38351	2.59548	5.9194	5.24001	5.52368	5.6958	5.33669	4.84586	3.77239	6.53289
744.341	3.09	NEG	Adouetine Z	M+FA-H	1	3.08695e-07	0.296198	3.37612	1.05427	3.55935	0.489022	0.568369	0.985093	0.7854	0.724699	1.49698	1.27567	2.10895	2.85801	2.78724	3.56306	4.27664	4.00141	3.65592	3.25195	4.08059
811.419	3.71	NEG	PI(12:0/18:3(6Z,9Z,12Z))	M+Cl	3	1.49918e-07	0.315436	3.17021	1.15148	3.65044	0.925609	0.687774	0.988905	0.993908	0.718181	1.47838	1.23631	2.18279	3.00845	3.3367	3.54238	4.51781	4.33667	3.55084	3.0936	3.8171
632.333	3.14	POS	PC(16:0/5:0(CHO))	M+K	0	2.52767e-07	0.339152	2.94853	0.825047	2.43268	0.441374	0.53854	0.807566	0.609758	0.547146	1.06322	1.02096	1.57181	1.86093	2.24419	2.42121	2.58295	2.50454	2.98418	2.46289	2.40055
549.487	9.23	POS	Cohibin A	M+H	1	1.01472e-08	0.355915	2.80966	2.56624	7.21025	2.8822	4.02976	1.96896	2.21053	2.44048	2.18992	2.3987	2.40933	6.62267	6.64905	6.43013	6.98698	7.88593	8.50959	8.31864	6.27901
593.896	2.27	POS	3-Phosphoadenylylselenate	M+K	4	2.47694e-08	0.398672	2.50833	0.741366	1.85959	0.853915	0.798849	0.838414	0.395619	0.773869	0.904555	0.52279	0.84292	1.85065	1.81983	1.73286	2.2606	1.81326	1.79808	1.53199	2.06944
495.079	2.27	POS	8-Hydroxytricetin 7-glucuronide	M+H	5	5.66282e-09	0.406611	2.45935	0.260557	0.640801	0.28856	0.254255	0.289013	0.164091	0.237369	0.297871	0.215175	0.33812	0.615754	0.622632	0.630491	0.775477	0.627474	0.613138	0.5496	0.691839
659.511	11.03	NEG	PE-Cer(d14:1(4E)/20:0)	M-H	3	3.16269e-08	0.410794	2.43431	8.97052	21.837	8.68845	9.26023	8.68455	8.73891	8.76807	10.4612	8.21285	8.94987	19.6175	19.6795	20.4216	21.9953	25.1793	17.7073	27.7283	22.3674
621.43	6.19	POS	Acetic acid, trifluoro-, tetradecyl ester	2M+H	2	0.031431	0.43362	2.30617	4.0675	9.38032	5.55476	5.74757	4.15896	1.27132	5.01491	4.0675	0.868924	5.85602	22.1442	9.21206	8.83679	4.53729	3.97521	9.38032	4.48691	12.4698
383.33	8.55	POS	5a-Cholesta-8,24-dien-3-one	M+H	1	1.87367e-09	0.473604	2.11147	14.8237	31.2998	16.088	15.4355	16.214	13.8074	16.9498	14.2504	12.5425	13.3022	26.8839	31.4333	33.9216	27.9289	32.9794	33.1828	35.1859	28.883
105.055	9.45	POS	3R-hydroxy-butanoic acid	M+H	1	1.73002e-09	0.480349	2.08182	1.95884	4.07795	2.11422	2.02847	2.13078	1.81451	2.22748	1.95884	1.64829	1.74812	3.53298	4.13084	4.45784	3.6703	4.33401	4.07795	4.62399	3.79568
522.319	11.41	POS	PS(19:0/0:0)	M+H-H2O	1	7.16332e-07	0.487523	2.05119	3.44803	7.07255	2.50693	2.15052	2.64966	4.20511	3.86646	3.52962	5.15212	3.52381	6.373	7.66621	7.13324	7.37915	5.705	7.68327	7.56259	7.07793
390.081	10.38	POS	Acetyl adenylate	M+H	0	3.22626e-08	0.519224	1.92595	2.5863	4.98109	2.27011	2.43693	2.93541	2.45499	2.52944	2.5863	2.75206	2.72515	4.13018	4.34159	5.88872	5.3576	5.30827	4.98109	5.22477	4.61648
280.09279	0.57	POS	Glycerophosphocholine	M+Na	2	1.87607e-06	0.549134	1.82105	1.66343	3.02919	1.87009	1.26443	2.32773	1.35747	1.77425	2.05922	1.35774	1.2965	2.76026	2.86701	2.66873	3.58886	3.16146	2.92927	3.14034	3.11758
148.061	1.6	POS	L-Glutamate	M+H	0	2.9845e-07	0.555189	1.80119	5.91297	10.6504	4.2574	5.33097	5.97568	6.62685	5.7905	5.91297	6.31372	7.09569	10.0179	10.5339	10.3696	11.6486	12.9977	10.6504	9.07682	9.90811
235.083	7.56	NEG	(R)-3-((R)-3-Hydroxybutanoyloxy)butanoate	M+FA-H	0	2.59951e-08	0.557394	1.79406	2.69696	4.83851	2.62686	2.86251	2.60872	2.48081	2.25398	2.69696	2.77052	3.27529	4.71696	4.17708	4.90219	5.42312	5.5174	4.83851	4.74497	4.38782
658.59	0.63	NEG	Cer(d18:0/22:0)	M+Cl	1	2.35957e-05	0.58196	1.71833	1.85561	3.18855	1.36818	1.54964	2.13127	1.67791	1.91086	1.85561	1.83937	2.51206	2.66939	3.12493	2.83824	2.99631	3.02333	3.18855	3.36925	4.29841
508.375	6.65	POS	Lysopc(p-18:0)	M+H	3	7.82215e-07	0.597389	1.67395	10.2897	17.2245	8.7676	11.4046	10.9607	9.67886	10.9773	10.2897	8.91274	11.3264	16.089	14.4659	19.6156	19.4208	19.6613	17.2245	15.3906	15.9286
354.265	6.67	NEG	3-[(3-hydroxytridecanoyl)oxy]-4-(trimethylazaniumyl)butanoate	M-H20-H	0	3.0781e-05	0.597941	1.6724	4.00288	6.69444	3.69754	3.71259	4.35659	3.75732	4.10498	4.00288	3.56863	4.82251	5.27899	5.24261	6.81448	8.84404	7.72571	6.69444	6.40586	6.54937
103.04	1.24	NEG	Acetone	M+FA-H	0	1.09104e-07	0.624005	1.60255	4.20569	6.73983	4.02082	4.6015	4.41674	3.81567	4.57084	4.20569	3.48723	4.527	6.0637	5.8019	7.01395	7.42134	7.40577	6.73983	6.39884	7.07333
207.05	1.65	POS	(R)-2-Hydroxybutane-1,2,4-tricarboxylate	M+H	1	2.11574e-07	0.637996	1.56741	48.1313	75.4415	40.6052	49.4137	49.4734	42.6664	46.1863	48.1313	51.621	56.9532	74.5529	65.7942	75.7682	82.0462	86.691	75.4415	71.5609	71.6768
959.629	6.35	POS	all-trans-Carophyll yellow	2M+K	3	2.48182e-06	0.667586	1.49793	5.21579	7.81291	5.08934	5.76009	5.4359	4.17987	5.75324	5.21579	4.7719	5.52019	7.25859	6.14885	8.25093	8.63772	8.49964	7.81291	7.75506	8.1396
838.537	0.63	NEG	PT(18:0/18:1(9Z))	M+Cl	0	2.77457e-06	0.689506	1.45031	6.70167	9.71953	6.31407	5.80927	6.96963	6.61231	6.32008	7.62159	6.14696	7.81948	9.30291	10.7685	8.68256	9.93925	9.81672	8.92491	9.15935	11.162
740.572	0.64	NEG	PC(O-12:0/O-20:0)[U]	M+Cl	1	4.3211e-07	0.693468	1.44203	9.31216	13.4284	8.57404	8.95885	9.6795	8.22792	9.71949	9.98882	8.84487	10.5038	12.2512	13.9435	12.0909	13.2966	13.8784	12.9592	13.5649	15.4424
464.081	8.28	POS	Adenylosuccinate	M+H	0	2.70748e-07	0.697951	1.43276	44.0282	63.082	39.1989	41.2921	44.732	47.1251	42.6949	44.0282	44.1115	49.0428	64.4518	61.7735	57.4125	68.6105	71.3372	63.082	57.2382	60.7504
61.0285	0.57	POS	Acetic acid	M+H	0	1.4222e-07	0.71991	1.38906	27.0797	37.6154	24.8468	28.1697	28.5252	24.7349	27.9121	27.0797	26.2578	29.1112	34.2485	34.6052	36.8681	40.9426	40.7572	37.6154	36.3345	39.5514
191.019	0.87	POS	Oxalosuccinic acid	M+H	2	2.81858e-07	0.724042	1.38114	50.5605	69.8309	45.5924	53.1457	52.8746	45.8055	52.2817	50.5605	48.9132	55.3102	62.3188	64.4848	68.6195	75.9222	74.7112	69.8309	69.2273	73.5322
594.377	7.49	NEG	Lysopc(20:1(11z))	M+FA-H	1	1.30315e-08	0.72774	1.37412	5.77273	7.93241	5.14943	6.14096	5.9607	5.66282	5.85337	5.77273	5.47465	6.16721	7.48993	7.6072	7.6528	8.12178	8.4823	7.93241	7.68495	8.4879
685.521	11.2	NEG	PA(O-16:0/20:2(11Z,14Z))	M-H	4	0.00038763	0.734242	1.36195	9.00679	12.2668	8.80532	9.49883	10.5087	10.9853	9.15932	8.09026	6.94181	8.06471	10.7864	13.0182	12.1367	11.888	13.6934	9.82393	14.3433	12.4443
494.323	5.41	POS	Cervonyl carnitine	M+Na	1	0.00010313	0.757129	1.32078	58.4539	77.2047	60.6065	66.4415	62.0047	45.6989	63.8494	58.4539	51.0388	59.5373	70.593	63.7948	85.4996	81.3426	76.1576	77.2047	79.0757	83.9694
580.672	0.63	NEG	Calcium trimetaphosphate	M-H2O-H	7	7.41471e-05	0.769649	1.29929	10.4486	13.5758	9.85704	8.71348	11.2264	11.0444	9.93103	11.2569	10.4828	11.077	12.9548	14.2905	12.0645	12.6018	14.0544	12.2153	14.6205	15.805
506.324	7.46	NEG	Lysope(0:0/20:1(11z))	M-H	2	6.21882e-07	0.781915	1.27891	7.96025	10.1805	6.82886	8.28413	7.92789	8.74907	8.1622	7.96025	7.6699	8.09972	10.0101	10.2824	9.4114	10.3373	11.0451	10.1805	9.77317	10.4038
522.283	6.95	NEG	Lysope(0:0/18:2(9z,12z))	M+FA-H	1	9.93963e-06	0.789578	1.2665	35.9823	45.5715	34.1081	36.0486	36.1978	31.3048	36.6592	35.9823	39.7386	37.8188	41.8887	41.7404	43.1599	47.5305	50.7296	45.5715	45.8496	48.1021
452.278	6.07	NEG	Lysope(0:0/16:0)	M-H	1	5.67383e-06	0.790035	1.26577	62.4877	79.0949	56.2166	64.7226	61.1457	64.5004	64.4611	62.4877	62.767	63.6007	75.7457	76.2499	72.0772	87.0037	89.0225	79.0949	74.1345	79.4307
450.298	6.86	NEG	2-hydroxyhexadecanoylcarnitine	M+Cl	2	5.39721e-05	0.792084	1.26249	11.1286	14.0498	9.67055	9.95566	10.902	12.4553	10.9859	11.1286	11.8277	12.1032	14.2112	14.7846	12.7797	14.2701	15.9672	14.0498	12.7049	13.6309
550.35	6.65	NEG	Lysopc(p-18:1(9z))	M+FA-H	3	6.8495e-05	0.81798	1.22252	19.3803	23.6928	15.8128	20.0652	20.3444	19.3923	19.4686	19.3803	19.2319	21.3467	21.7673	21.639	25.5165	24.4216	25.5894	23.6928	23.4957	23.4204
516.305	13.96	POS	PC(16:1(9E)/0:0)	M+Na	1	0.00196723	0.822275	1.21614	2.76578	3.36357	2.52141	2.30832	2.7084	3.48583	2.90778	2.59958	3.00046	2.59444	3.02748	3.51906	3.32878	3.35539	2.96897	3.58546	3.71022	3.41319
737.649	0.64	NEG	20:1 Campesteryl ester	M+FA-H	4	0.00350155	0.84827	1.17887	2.76326	3.25753	2.41928	2.52707	2.80103	3.17778	2.47537	2.92692	3.10231	2.67635	3.14076	3.47862	3.00023	3.19575	3.54896	2.82195	3.26008	3.61387
542.335	6.1	NEG	Lysopc(p-18:0)	M+Cl	6	5.74956e-05	0.84928	1.17747	13.749	16.189	12.7882	14.5748	13.6479	13.2339	14.5371	13.749	13.678	13.7829	14.1347	15.1729	16.1607	16.7791	17.1289	16.189	16.7131	17.2334
554.347	6.55	NEG	Lysope(0:0/20:0)	M+FA-H	2	0.000254638	0.86383	1.15763	9.03444	10.4586	8.66353	9.58284	9.35501	8.22586	9.47514	9.03444	8.57583	9.36285	9.44025	9.49493	10.4875	10.7678	11.2182	10.4586	10.7003	11.1011
586.313	5.23	NEG	Lysopc(20:5(5z,8z,11z,14z,17z))	M+FA-H	3	0.00482144	1.3508	0.7403	6.54035	4.84182	6.37624	8.41355	6.78698	5.32121	7.43467	6.54035	5.7331	5.71671	4.13645	4.19415	5.80204	3.73013	3.84564	4.84182	6.23582	5.94851
133.051	0.9	NEG	Butanoate	M+FA-H	1	9.44744e-10	1.35289	0.739159	7.54212	5.57482	7.05468	7.87972	7.6942	7.37711	7.7814	7.54212	7.13731	7.8704	5.18517	5.38364	5.67332	5.73312	5.89709	5.57482	5.56821	5.58322
681.297	8.39	NEG	2-hydroxyenterodiol	2M+FA-H	7	0.0235205	1.36747	0.731278	31.0755	22.7248	15.8392	39.1318	27.2028	42.3681	29.5877	31.0755	32.2451	31.1539	31.0394	22.5478	20.767	14.9001	20.195	22.7248	27.2902	22.3342
248.077	1.65	POS	N-Succinyl-L-glutamate	M+H	1	6.7359e-07	1.37937	0.724967	11.0404	8.00393	11.29	11.4406	10.9079	11.123	11.684	11.0404	10.9908	9.84654	6.90193	7.90101	8.63983	8.42956	8.20341	8.00393	9.24266	6.70909
192.064	5.65	POS	Pyridoxine (Vitamin B6)	M+Na	2	7.16364e-07	1.38264	0.723253	7.56963	5.47476	7.9312	7.20729	7.76486	7.16042	7.8791	7.56963	7.92231	7.12223	4.8001	5.49141	6.12829	5.15768	5.24747	5.47476	6.57547	4.92292
588.33	5.67	NEG	Lysopc(20:4(5z,8z,11z,14z))	M+FA-H	2	0.00174711	1.41261	0.707907	14.9437	10.5788	14.132	19.5412	15.4323	12.0474	16.7682	14.9437	13.2951	13.3898	9.14968	9.15272	12.739	8.18154	8.45624	10.5788	13.5648	12.8074
544.339	5.67	POS	Lysopc(20:4(8z,11z,14z,17z))	M+H	2	0.00659693	1.49291	0.669833	7.23805	4.84828	7.31684	10.4436	7.51054	4.93789	8.5202	7.23805	5.72401	6.2132	4.15497	3.72088	6.39029	3.61707	3.63116	4.84828	6.31392	6.10969
111.005	0.67	POS	pyruvate	M+Na	1	9.65027e-07	1.52199	0.657035	12.5034	8.21517	10.4773	12.4628	12.3399	13.631	12.3834	12.5034	13.2833	12.9459	7.16262	7.45678	10.0766	8.63831	8.79285	8.21517	8.85542	6.52356
131.087	0.94	NEG	Dicyclopentadiene	M-H	3	6.51713e-07	1.55566	0.642816	3.007	1.93294	2.70902	3.10657	2.89406	3.56287	2.896	2.77518	3.24421	2.86805	1.89383	1.94391	2.07098	2.05765	1.93616	1.52806	2.25459	1.77837
325.275	8.83	NEG	6,10,14-trimethyl-2-methylenepentadecanal	M+FA-H	0	0.0137846	1.61824	0.617957	9.86328	6.09508	12.8396	7.42242	10.2492	14.0051	6.58472	9.86328	4.61744	13.3245	5.3514	4.42091	7.72351	5.65199	5.56508	6.09508	4.74202	9.21067
163.972	1.24	POS	Carbamoyl phosphate	M+Na	2	2.45637e-07	1.68134	0.594764	21.5567	12.8212	20.8353	23.5882	20.621	17.6989	22.74	21.5567	21.4542	23.9593	11.3714	10.9782	15.8221	12.6241	13.4565	12.8212	14.682	10.814
695.414	7.77	NEG	Bexarotene	2M-H	5	9.23562e-05	1.70347	0.587037	3.21214	1.88565	3.48187	4.32546	2.54129	2.06292	3.2761	3.21214	3.51448	3.28288	2.07275	1.9609	1.72449	1.71336	1.70929	1.88565	1.89041	2.12833
320.062	0.82	NEG	Beta-citryl-l-glutamic acid	M-H	1	3.11217e-08	1.70481	0.586576	4.61724	2.70836	4.94109	4.50128	4.36687	4.80063	4.72166	4.61724	5.06882	3.92032	2.43342	2.76119	3.10916	2.57781	2.55314	2.70836	3.26714	2.25666
933.487	13.98	NEG	Phosphatidylinositol-3-phosphate	M-H2O-H	2	3.02655e-06	1.73666	0.575819	9.73386	5.60494	10.0446	9.54053	9.5675	11.7028	10.2695	9.1993	9.67132	7.8752	6.07141	7.26095	5.19223	4.30266	5.70255	3.94817	6.81663	5.54492
180.067	0.85	NEG	L-Tyrosine	M-H	0	4.87343e-06	1.7593	0.568407	7.39364	4.2026	6.3421	7.44536	7.01707	9.73107	7.29794	6.27256	8.21423	6.82883	4.21029	4.40755	4.92408	4.35828	4.56393	3.25487	4.40631	3.49546
130.086	0.96	NEG	L-Leucine	M-H	6	1.13497e-06	1.80763	0.553211	22.6792	12.5464	20.2598	21.8498	21.1194	28.9517	22.625	19.896	25.4356	21.296	11.9991	12.4366	15.1645	13.4187	13.2591	9.36486	13.5453	11.1827
342.086	1.57	NEG	5'-methylthioadenosine	M+FA-H	5	1.13257e-08	1.87164	0.534291	2.41291	1.2892	2.06535	2.55722	2.27593	2.20731	2.40987	2.41291	2.68937	2.68536	1.17645	1.22944	1.49545	1.2224	1.38074	1.2892	1.459	1.06091
463.294	5.88	NEG	3-mercaptohexyl hexanoate	2M-H	3	1.96614e-07	1.96433	0.50908	15.8151	8.05114	16.7629	11.7731	16.1026	16.2772	16.0546	15.8151	16.5792	17.1559	6.96808	9.72414	7.88039	9.83767	9.65707	8.05114	6.88414	5.4065
413.103	1.22	NEG	Penicilloic acid V	M+FA-H	2	5.03847e-06	2.003	0.499252	3.70498	1.84972	3.00199	3.61246	3.60831	5.10303	3.49929	3.20782	4.14686	3.46006	1.65964	1.83368	2.26571	2.06767	2.02208	1.45531	2.14031	1.35333
606.073	0.91	NEG	UDP-N-acetyl-D-galactosamine	M-H	1	1.76501e-05	2.09882	0.476457	159.781	76.1287	138.901	154	168.473	228.327	158.61	128.5	177.735	123.7	67.1594	76.2519	94.7382	87.255	79.5337	57.6963	94.6165	51.7788
465.308	5.88	POS	3-mercaptohexyl hexanoate	2M+H	3	3.26235e-07	2.19228	0.456147	4.71057	2.14871	5.56102	3.39133	4.84309	4.57661	4.85633	4.71057	4.62781	5.11784	1.95576	2.52544	2.10979	2.7717	2.69575	2.14871	1.69552	1.28703

## Sheet: KEGG Enrichment
Table S3.2:Functional enrichment of KEGG pathway on B3GALNT2-associated Metabolites
Label	P-val	Adjusted p-val	in bckgnd	In set	%	Compounds
Butanoate metabolism	8.54e-08	4.87e-06	40	6	27.3	C00025 C00022 C04546 C01089 C00164 C00246
Synthesis and degradation of ketone bodies	3.96e-06	0.000113	6	3	13.6	C00207 C01089 C00164
Alanine, aspartate and glutamate metabolism	1.04e-05	0.000198	24	4	18.2	C00169 C03794 C00022 C00025
Pyruvate metabolism	3.42e-05	0.000487	32	4	18.2	C05993 C00033 C00022 C01251
Arginine and proline metabolism	0.00135755	0.015476	82	4	18.2	C05931 C00169 C00022 C00025
Metabolic pathways	0.00223146	0.0211989	1455	16	72.7	C01251 C00025 C05379 C03794 C00082 C00207 C00022 C00170 C00246 C00164 C01089 C00169 C00123 C00314 C00033 C00203
Taurine and hypotaurine metabolism	0.00638594	0.0454998	20	2	9.1	C00033 C00022
Citrate cycle (TCA cycle)	0.00638594	0.0454998	20	2	9.1	C00022 C05379
Aminoacyl-tRNA biosynthesis	0.0101694	0.0507445	75	3	13.6	C00082 C00025 C00123
Nitrogen metabolism	0.010683	0.0507445	26	2	9.1	C00025 C00169
Thiamine metabolism	0.010683	0.0507445	26	2	9.1	C00082 C00022
Tyrosine metabolism	0.0105454	0.0507445	76	3	13.6	C00022 C00082 C00164
Valine, leucine and isoleucine biosynthesis	0.0123335	0.0540778	28	2	9.1	C00123 C00022
Glycolysis / Gluconeogenesis	0.0150047	0.0568074	31	2	9.1	C00033 C00022
Vitamin B6 metabolism	0.0159459	0.0568074	32	2	9.1	C00314 C00022
Selenoamino acid metabolism	0.0140887	0.0568074	30	2	9.1	C05696 C00033
Purine metabolism	0.0176797	0.059279	92	3	13.6	C03794 C00169 C05993
Propanoate metabolism	0.0199567	0.0631963	36	2	9.1	C00207 C00164
Valine, leucine and isoleucine degradation	0.0255005	0.0765014	41	2	9.1	C00164 C00123
Glycerophospholipid metabolism	0.0315989	0.0857684	46	2	9.1	C00670 C04230
Phenylalanine metabolism	0.0315989	0.0857684	46	2	9.1	C00082 C00022
Cysteine and methionine metabolism	0.0453191	0.117418	56	2	9.1	C00170 C00022
ABC transporters	0.104095	0.257975	90	2	9.1	C00123 C00025
Nicotinate and nicotinamide metabolism	1	1	44	1	4.5	C00022
Glycine, serine and threonine metabolism	1	1	49	1	4.5	C00022
Phenylalanine, tyrosine and tryptophan biosynthesis	1	1	27	1	4.5	C00082
Sulfur metabolism	1	1	18	1	4.5	C00033
Pantothenate and CoA biosynthesis	1	1	27	1	4.5	C00022
Glyoxylate and dicarboxylate metabolism	1	1	44	1	4.5	C00022
Proximal tubule bicarbonate reclamation	1	1	17	1	4.5	C00025
Histidine metabolism	1	1	44	1	4.5	C00025
Amino sugar and nucleotide sugar metabolism	1	1	87	1	4.5	C00203
Ether lipid metabolism	1	1	23	1	4.5	C00670
Butirosin and neomycin biosynthesis	1	1	29	1	4.5	C00025
Huntington's disease	1	1	3	1	4.5	C00025
D-Glutamine and D-glutamate metabolism	1	1	12	1	4.5	C00025
Parkinson's disease	1	1	13	1	4.5	C00082
Terpenoid backbone biosynthesis	1	1	33	1	4.5	C00022
Amyotrophic lateral sclerosis (ALS)	1	1	10	1	4.5	C00025
Type II diabetes mellitus	1	1	6	1	4.5	C00022
Ascorbate and aldarate metabolism	1	1	47	1	4.5	C00022
Gap junction	1	1	11	1	4.5	C00025
Lysine biosynthesis	1	1	32	1	4.5	C01251
Neuroactive ligand-receptor interaction	1	1	128	1	4.5	C00025
Long-term depression	1	1	9	1	4.5	C00025
Cyanoamino acid metabolism	1	1	41	1	4.5	C00082
Glutathione metabolism	1	1	38	1	4.5	C00025
Biosynthesis of secondary metabolites	0.631582	1	1023	6	27.3	C00033 C00025 C00082 C00022 C05379 C00123
Long-term potentiation	1	1	7	1	4.5	C00025
Pyrimidine metabolism	1	1	59	1	4.5	C00169
Glycosaminoglycan biosynthesis - heparan sulfate	1	1	3	1	4.5	C00033
Pentose and glucuronate interconversions	1	1	53	1	4.5	C00022
Pentose phosphate pathway	1	1	32	1	4.5	C00022
Taste transduction	1	1	13	1	4.5	C00025
Porphyrin and chlorophyll metabolism	1	1	126	1	4.5	C00025
Melanogenesis	1	1	6	1	4.5	C00082
Ubiquinone and other terpenoid-quinone biosynthesis	1	1	76	1	4.5	C00082
